# Supplementary material for: Informing tobacco control policy in Jordan: assessing the effectiveness of pictorial warning labels on cigarette packs
Source: PubMed Central journal article supplement (PMC5540564; doi:10.1186/s12889-017-4642-8), 2017-08-01
Supplement: 12889_2017_4642_MOESM1_ESM.pdf [file 12889_2017_4642_MOESM1_ESM.pdf]

Surveyor name:

Survey serial number:

## Evaluating the effectiveness of pictorial warning labels on cigarette packs

### Section A:

|    |       |                    |
|----|-------|--------------------|
| A1 | Sex   | - Male<br>- Female |
| A2 | Age   | _____ years        |
| A3 | Major |                    |
| A4 | Year  |                    |

### Section B:

| To what extent do you agree with the following statements |                                                            | Strongly disagree | Disagree | Neutral | Agree | Strongly agree |
|-----------------------------------------------------------|------------------------------------------------------------|-------------------|----------|---------|-------|----------------|
| B1                                                        | Smoking is harmful to smokers                              |                   |          |         |       |                |
| B2                                                        | Exposure to cigarette smoke is harmful to non-smokers      |                   |          |         |       |                |
| B3                                                        | Exposure to cigarette smoke is harmful to smokers          |                   |          |         |       |                |
| B4                                                        | It is important to have health warnings on cigarette packs |                   |          |         |       |                |

## Section C:

| Please choose the most appropriate response |                                                                                                                     |                                                                                                                                                                                                                                                                                                                                                                     |
|---------------------------------------------|---------------------------------------------------------------------------------------------------------------------|---------------------------------------------------------------------------------------------------------------------------------------------------------------------------------------------------------------------------------------------------------------------------------------------------------------------------------------------------------------------|
| C1                                          | In the last month, did you notice any health warning on cigarette packs?                                            | <ul style="list-style-type: none"> <li>- Yes</li> <li>- No (<i>skip to C4</i>)</li> <li>- I have not seen any cigarette packs (<i>skip to C4</i>)</li> </ul>                                                                                                                                                                                                        |
| C2                                          | Where is it located?                                                                                                | <ul style="list-style-type: none"> <li>- Front</li> <li>- Side</li> <li>- Back</li> <li>- Both front and back</li> </ul>                                                                                                                                                                                                                                            |
| C3                                          | What does it say? You can choose more than one statement                                                            | <ul style="list-style-type: none"> <li>- Smoking is an addition, do not start</li> <li>- Smoking affects children, protect your children from smoking</li> <li>- Keep your children away from smokers to protect them from respiratory diseases</li> <li>- Smoking causes slow and painful death</li> <li>- Other (specify.....)</li> <li>- I don't know</li> </ul> |
| C4                                          | Currently you are                                                                                                   | <ul style="list-style-type: none"> <li>- A regular cigarette smoker, _____ cigs/day</li> <li>- An occasional cigarette smoker</li> <li>- Former smoker (<i>skip to D1</i>)</li> <li>- Non-smoker (<i>skip to D1</i>)</li> </ul>                                                                                                                                     |
| C5                                          | In the last month, how many times did you notice the health warning on cigarette packs?                             | <ul style="list-style-type: none"> <li>- Every time I held a cigarette pack</li> <li>- Some of the times I held a cigarette pack</li> <li>- Rarely</li> <li>- I never noticed it</li> </ul>                                                                                                                                                                         |
| C6                                          | Do you feel any unease due to the presence of health warnings on cigarette packs?                                   | <ul style="list-style-type: none"> <li>- No</li> <li>- Yes</li> </ul>                                                                                                                                                                                                                                                                                               |
| C7                                          | In the last month, did you avoid looking at health warnings on cigarette packs (for example through covering them)? | <ul style="list-style-type: none"> <li>- No</li> <li>- Yes</li> </ul>                                                                                                                                                                                                                                                                                               |
| C8                                          | In the last month, did any health warning on cigarette packs affect you to the extent you are considering quitting? | <ul style="list-style-type: none"> <li>- No</li> <li>- Yes</li> </ul>                                                                                                                                                                                                                                                                                               |
| C9                                          | In your opinion, health warnings on cigarette packs should include _____ information on health                      | <ul style="list-style-type: none"> <li>- Less</li> <li>- More</li> <li>- Same amount of</li> </ul>                                                                                                                                                                                                                                                                  |
| C10                                         | Are you thinking about quitting in the coming 6 months?                                                             | <ul style="list-style-type: none"> <li>- No</li> <li>- Yes</li> </ul>                                                                                                                                                                                                                                                                                               |
| C11                                         | Did you try quitting in the past 12 months?                                                                         | <ul style="list-style-type: none"> <li>- No (<i>skip to D1</i>)</li> <li>- Yes</li> </ul>                                                                                                                                                                                                                                                                           |
| C12                                         | When was this attempt?                                                                                              | <ul style="list-style-type: none"> <li>- Less than 6 months ago</li> <li>- More than 6 months ago</li> </ul>                                                                                                                                                                                                                                                        |

**Section D: Warning 1 (show image):**

|    |                                        |               |
|----|----------------------------------------|---------------|
| D1 | Have you previously seen this warning? | - No<br>- Yes |
|----|----------------------------------------|---------------|

|                                                                                                                          |                               |                   |                         |
|--------------------------------------------------------------------------------------------------------------------------|-------------------------------|-------------------|-------------------------|
| <b>Please circle the number from 1 to 5 that best represents your perception of the warning that you have just seen.</b> |                               |                   |                         |
| D2                                                                                                                       | Can be easily ignored         | 1   2   3   4   5 | Attracts attention      |
| D3                                                                                                                       | Not fearful                   | 1   2   3   4   5 | Very fearful            |
| D4                                                                                                                       | Did not add to my information | 1   2   3   4   5 | Added to my information |

|                                                               |                                                  |                   |          |         |       |                |
|---------------------------------------------------------------|--------------------------------------------------|-------------------|----------|---------|-------|----------------|
| <b>If you are a non-smoker, please complete this section.</b> |                                                  | Strongly disagree | Disagree | Neutral | Agree | Strongly agree |
| D5                                                            | Seeing this warning motivates to stay smoke-free |                   |          |         |       |                |

|                                                           |                                               |                   |          |         |       |                |
|-----------------------------------------------------------|-----------------------------------------------|-------------------|----------|---------|-------|----------------|
| <b>If you are a smoker, please complete this section.</b> |                                               | Strongly disagree | Disagree | Neutral | Agree | Strongly agree |
| D6                                                        | Seeing this warning motivates to quit smoking |                   |          |         |       |                |

**Section E: Warning 2 (show image):**

|    |                                        |               |
|----|----------------------------------------|---------------|
| E1 | Have you previously seen this warning? | - No<br>- Yes |
|----|----------------------------------------|---------------|

| <b>Please circle the number from 1 to 5 that best represents your perception of the warning that you have just seen.</b> |                               |                   |                         |
|--------------------------------------------------------------------------------------------------------------------------|-------------------------------|-------------------|-------------------------|
| E2                                                                                                                       | Can be easily ignored         | 1   2   3   4   5 | Attracts attention      |
| E3                                                                                                                       | Not fearful                   | 1   2   3   4   5 | Very fearful            |
| E4                                                                                                                       | Did not add to my information | 1   2   3   4   5 | Added to my information |

| <b>If you are a non-smoker, please complete this section.</b> |                                                  | Strongly disagree | Disagree | Neutral | Agree | Strongly agree |
|---------------------------------------------------------------|--------------------------------------------------|-------------------|----------|---------|-------|----------------|
| E5                                                            | Seeing this warning motivates to stay smoke-free |                   |          |         |       |                |

| <b>If you are a smoker, please complete this section.</b> |                                               | Strongly disagree | Disagree | Neutral | Agree | Strongly agree |
|-----------------------------------------------------------|-----------------------------------------------|-------------------|----------|---------|-------|----------------|
| E6                                                        | Seeing this warning motivates to quit smoking |                   |          |         |       |                |

**Section F: Warning 3 (show image):**

|    |                                        |               |
|----|----------------------------------------|---------------|
| F1 | Have you previously seen this warning? | - No<br>- Yes |
|----|----------------------------------------|---------------|

| <b>Please circle the number from 1 to 5 that best represents your perception of the warning that you have just seen.</b> |                               |                   |                         |
|--------------------------------------------------------------------------------------------------------------------------|-------------------------------|-------------------|-------------------------|
| F2                                                                                                                       | Can be easily ignored         | 1   2   3   4   5 | Attracts attention      |
| F3                                                                                                                       | Not fearful                   | 1   2   3   4   5 | Very fearful            |
| F4                                                                                                                       | Did not add to my information | 1   2   3   4   5 | Added to my information |

| <b>If you are a non-smoker, please complete this section.</b> |                                                  | Strongly disagree | Disagree | Neutral | Agree | Strongly agree |
|---------------------------------------------------------------|--------------------------------------------------|-------------------|----------|---------|-------|----------------|
| F5                                                            | Seeing this warning motivates to stay smoke-free |                   |          |         |       |                |

| <b>If you are a smoker, please complete this section.</b> |                                               | Strongly disagree | Disagree | Neutral | Agree | Strongly agree |
|-----------------------------------------------------------|-----------------------------------------------|-------------------|----------|---------|-------|----------------|
| F6                                                        | Seeing this warning motivates to quit smoking |                   |          |         |       |                |

**Section G: Warning 4 (show image):**

|    |                                        |               |
|----|----------------------------------------|---------------|
| G1 | Have you previously seen this warning? | - No<br>- Yes |
|----|----------------------------------------|---------------|

| <b>Please circle the number from 1 to 5 that best represents your perception of the warning that you have just seen.</b> |                               |                   |                         |
|--------------------------------------------------------------------------------------------------------------------------|-------------------------------|-------------------|-------------------------|
| G2                                                                                                                       | Can be easily ignored         | 1   2   3   4   5 | Attracts attention      |
| G3                                                                                                                       | Not fearful                   | 1   2   3   4   5 | Very fearful            |
| G4                                                                                                                       | Did not add to my information | 1   2   3   4   5 | Added to my information |

| <b>If you are a non-smoker, please complete this section.</b> |                                                  | Strongly disagree | Disagree | Neutral | Agree | Strongly agree |
|---------------------------------------------------------------|--------------------------------------------------|-------------------|----------|---------|-------|----------------|
| G5                                                            | Seeing this warning motivates to stay smoke-free |                   |          |         |       |                |

| <b>If you are a smoker, please complete this section.</b> |                                               | Strongly disagree | Disagree | Neutral | Agree | Strongly agree |
|-----------------------------------------------------------|-----------------------------------------------|-------------------|----------|---------|-------|----------------|
| G6                                                        | Seeing this warning motivates to quit smoking |                   |          |         |       |                |
